# Supplementary material for: Tunable plasmon resonances in a metallic nanotip–film system
Source: Royal Society of Chemistry journal article supplement (doi:10.1039/c2nr31542d), 2012-01-01

## Supplementary Information

A scanning electron microscope image of the gold-coated tip used in this study. The size of the tip apex after gold coating is about 30 nm.

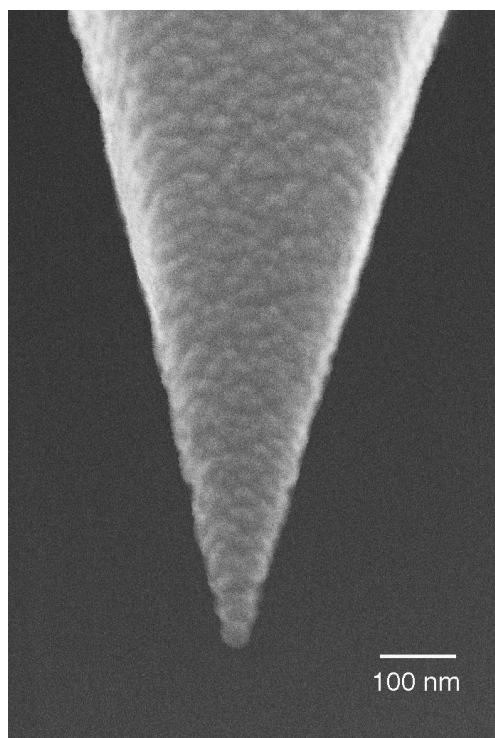

Supplement: c2nr31542d.pdf [file c2nr31542d.pdf]
